# Supplementary material
Source: PubMed Central journal article supplement (PMC2737268)
Supplement: NIHMS115462-supplement-06.pdf [file NIHMS115462-supplement-06.pdf]

## Supplementary Information Titles

Please list each supplementary item and its title or caption, in the order shown below.

**Note that we do NOT copy edit or otherwise change supplementary information, and minor (nonfactual) errors in these documents cannot be corrected after publication.**

Please submit document(s) exactly as you want them to appear, with all text, images, legends and references in the desired order, and check carefully for errors.

|                                     |
|-------------------------------------|
| <b>Journal:</b> Nature Neuroscience |
|-------------------------------------|

|                              |                                                                                             |
|------------------------------|---------------------------------------------------------------------------------------------|
| <b>Article Title:</b>        | $\beta$ -catenin-mediated Wnt signaling regulates neurogenesis in the ventral telencephalon |
| <b>Corresponding Author:</b> | Stewart A. Anderson                                                                         |
|                              |                                                                                             |

| Supplementary Item & Number<br>(add rows as necessary) | Title or Caption                                                                                                                               |
|--------------------------------------------------------|------------------------------------------------------------------------------------------------------------------------------------------------|
| Supplementary Figure 1                                 | Relative functions of Wnt and Shh signaling in telencephalon development                                                                       |
| Supplementary Figure 2                                 | Further examination of proliferative and mantle zones of <i>Nkx2.1Cre;β-cat<sup>F1/F1</sup></i> embryos                                        |
| Supplementary Figure 3                                 | Preserved patterning of the LGE and the MGE/LGE sulcus in the <i>Nkx2.1Cre;β-cat<sup>F1/F1</sup></i> mutant                                    |
| Supplementary Figure 4                                 | Reduction of neuropeptide Y (NPY) and somatostatin (SOM)-expressing cortical interneurons in the <i>Nkx2.1Cre;β-cat<sup>F1/F1</sup></i> mutant |
| Supplementary Figure 5                                 | Reduction of TCF-LacZ activity in Dkk1 treated telencephalic slices                                                                            |
| Supplementary Figure 6                                 | Inhibition of N-cadherin-mediated cell adhesion does not decrease proliferation in the MGE of slice cultures                                   |
| Supplementary Table 1                                  | Primary antibodies                                                                                                                             |
| Supplementary Methods (or Discussion or Data or Note)  | [NO DESCRIPTIVE TITLE NECESSARY]                                                                                                               |
| Supplementary Video 1 (or Audio or Spreadsheet)        | [CAPTION TO BE POSTED ONLINE (include title and explanation of contents)]                                                                      |
